# Supplementary material for: Habitat Selection of Three Neotropical Grassland Birds Is Dependent on Vegetation Structure and Resources
Source: MDPI journal article supplement (doi:10.3390/d16040229), 2024-04-10
Supplement: s1 [file s1]

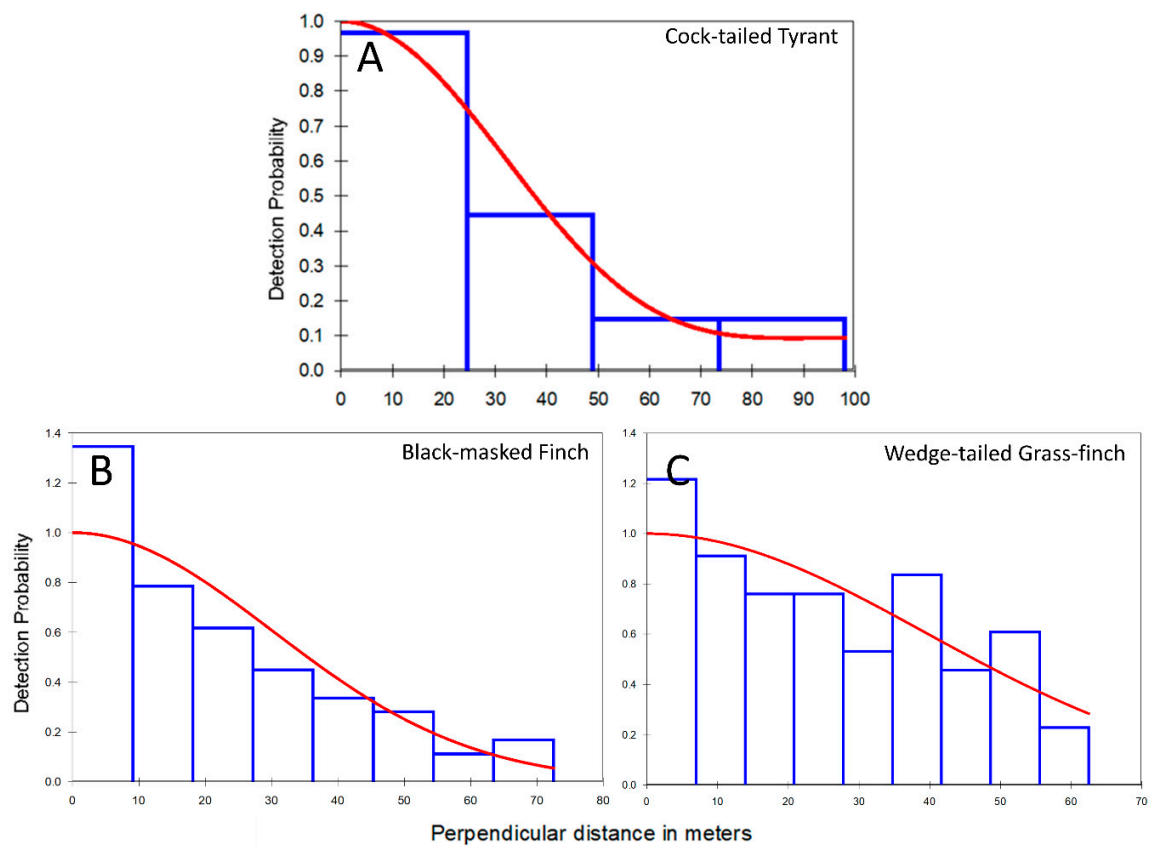

Supplementary Figure S1: Fitted detection curves for study species: A) Cock-tailed Tyrant; B) Black-masked Finch; and C) Wedge-tailed Grass-finch representing the probability of detection in relation to the perpendicular distance from the transect line. Where necessary, observed distance data was truncated and for all species (see methods).
